# Supplementary material for: Ring size in cyclic endomorphin-2 analogs modulates receptor binding affinity and selectivity
Source: Royal Society of Chemistry journal article supplement (doi:10.1039/c5ob00565e), 2015-01-01

## Supporting information

### Ring size in cyclic endomorphin-2 analogs modulates receptor binding affinity and selectivity

Justyna Piekiełna<sup>a</sup>, Alicja Kluczyk<sup>b</sup>, Luca Gentilucci<sup>c</sup>, Maria Camilla Cerlesi<sup>d</sup>, Girolamo Calo<sup>d</sup>, Csaba Tomböly<sup>e</sup>, Krzysztof Łapiński<sup>f</sup>, Tomasz Janecki<sup>g</sup>, Anna Janecka<sup>a,\*</sup>

<sup>a</sup>Department of Biomolecular Chemistry, Faculty of Medicine, Medical University of Lodz, Lodz, Poland

<sup>b</sup>Faculty of Chemistry, University of Wrocław, Wrocław, Poland

<sup>c</sup>Department of Chemistry 'G. Ciamician', University of Bologna, via Selmi 2, 40126 Bologna, Italy

<sup>d</sup>Department of Medical Science, Section of Pharmacology, and National Institute of Neuroscience, University of Ferrara, 44121 Ferrara, Italy

<sup>e</sup>Institute of Biochemistry, Biological Research Centre of Hungarian Academy of Sciences, Szeged, Hungary

<sup>f</sup>TriMen Chemicals Ltd, 92-318 Lodz, Poland

<sup>g</sup>Institute of Organic Chemistry, Lodz University of Technology, 90-924 Lodz, Poland

S1: Contents

S2: High resolution MS spectra

S3: <sup>1</sup>H NMR spectra

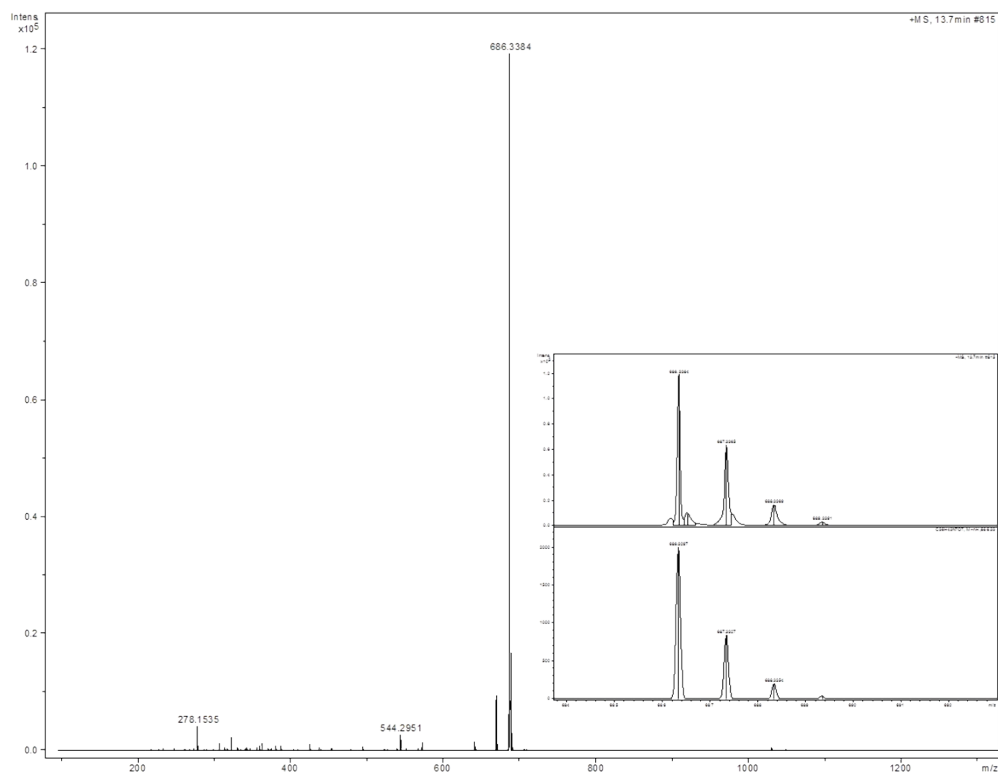

**Fig. 1.** High resolution MS spectrum of peptide Tyr-c[D-Orn-Phe-Phe-Asp]NH<sub>2</sub>. In inset, fragment of the experimental spectrum is compared with the simulated isotopic profile calculated for the expected molecular formula of protonated species (bottom panel).

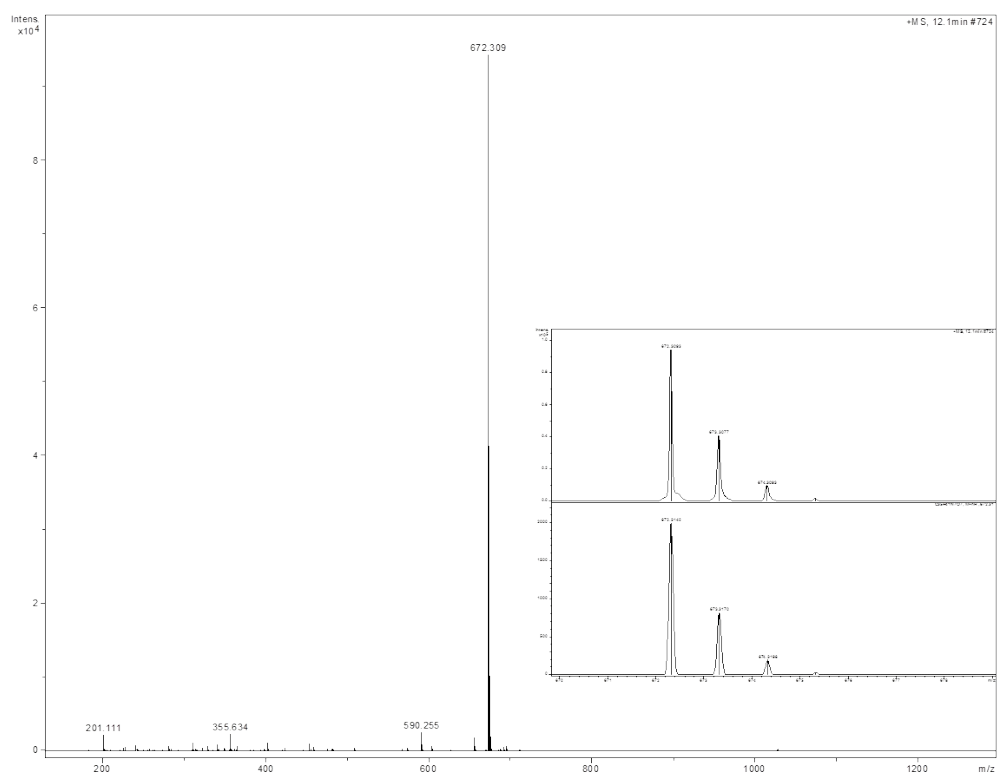

**Fig. 2.** High resolution MS spectrum of peptide Tyr-c[D-Dab-Phe-Phe-Asp]NH<sub>2</sub>. In inset, fragment of the experimental spectrum is compared with the simulated isotopic profile calculated for the expected molecular formula of protonated species (bottom panel)

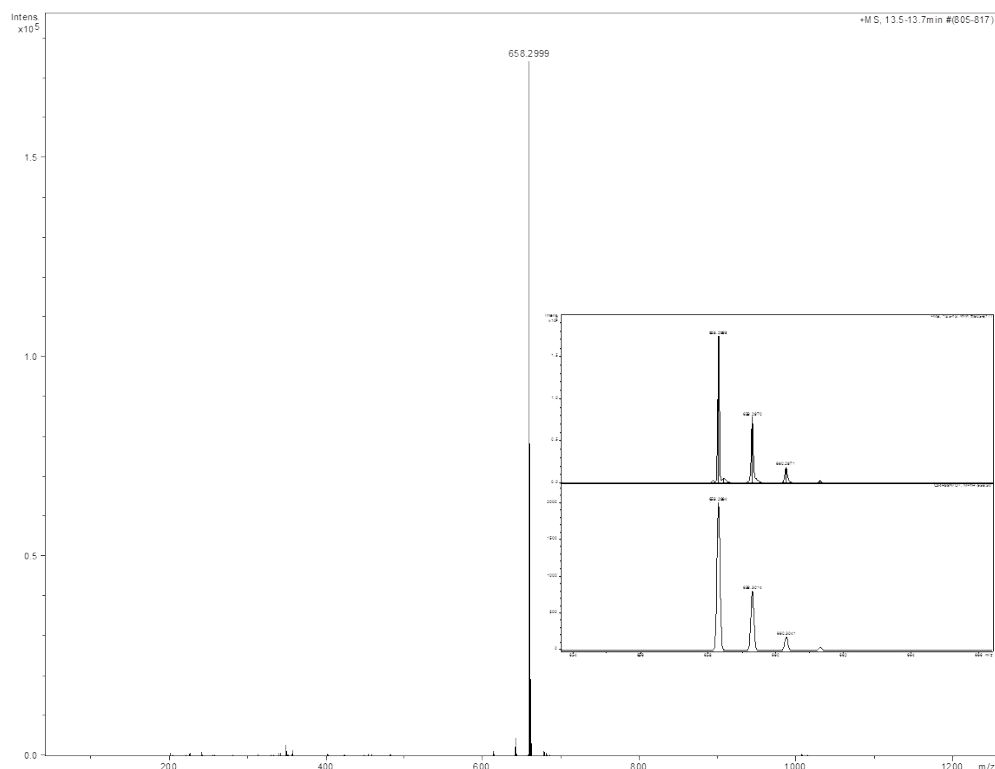

**Fig. 3.** High resolution MS spectrum of peptide 4 Tyr-c[D-Dap-Phe-Phe-Asp]NH<sub>2</sub>. In inset, fragment of the experimental spectrum is compared with the simulated isotopic profile calculated for the expected molecular formula of protonated species (bottom panel)

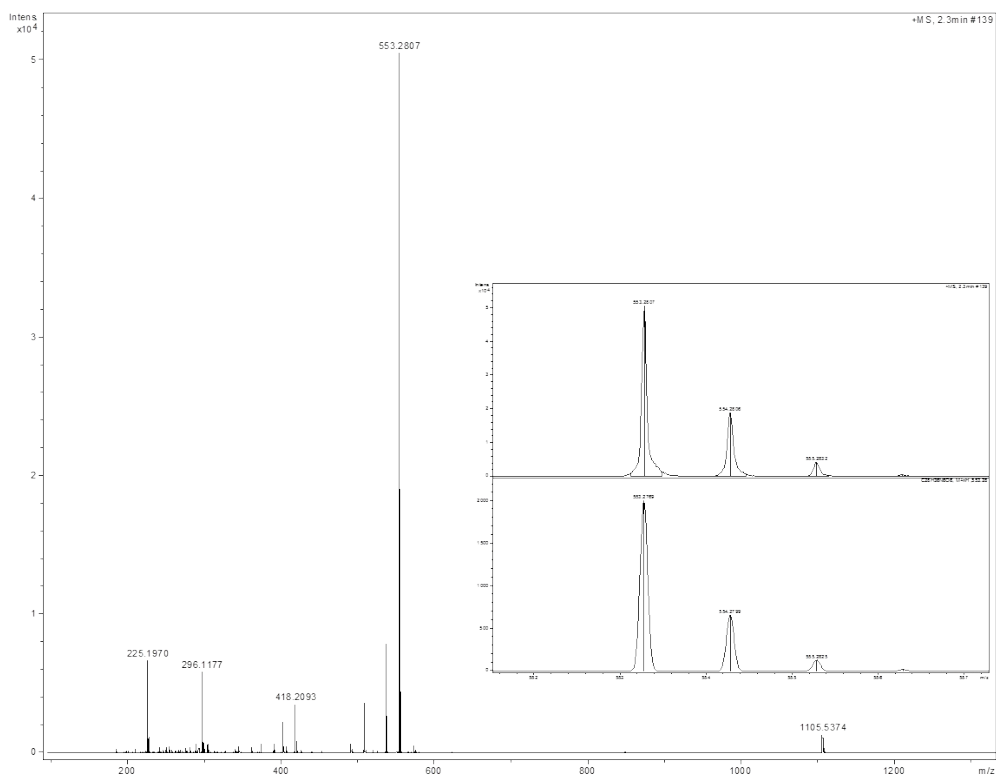

**Fig. 4.** High resolution MS spectrum of peptide 5 Tyr-c[D-Lys-Phe-Asp]NH<sub>2</sub>. In inset, fragment of the experimental spectrum is compared with the simulated isotopic profile calculated for the expected molecular formula of protonated species (bottom panel)

This report was created by ACD/NMR Processor Academic Edition. For more information go to [www.acdlabs.com/nmrproc/](http://www.acdlabs.com/nmrproc/)

# Tyr-c[D-Orn-Phe-Phe-Asp]NH<sub>2</sub>

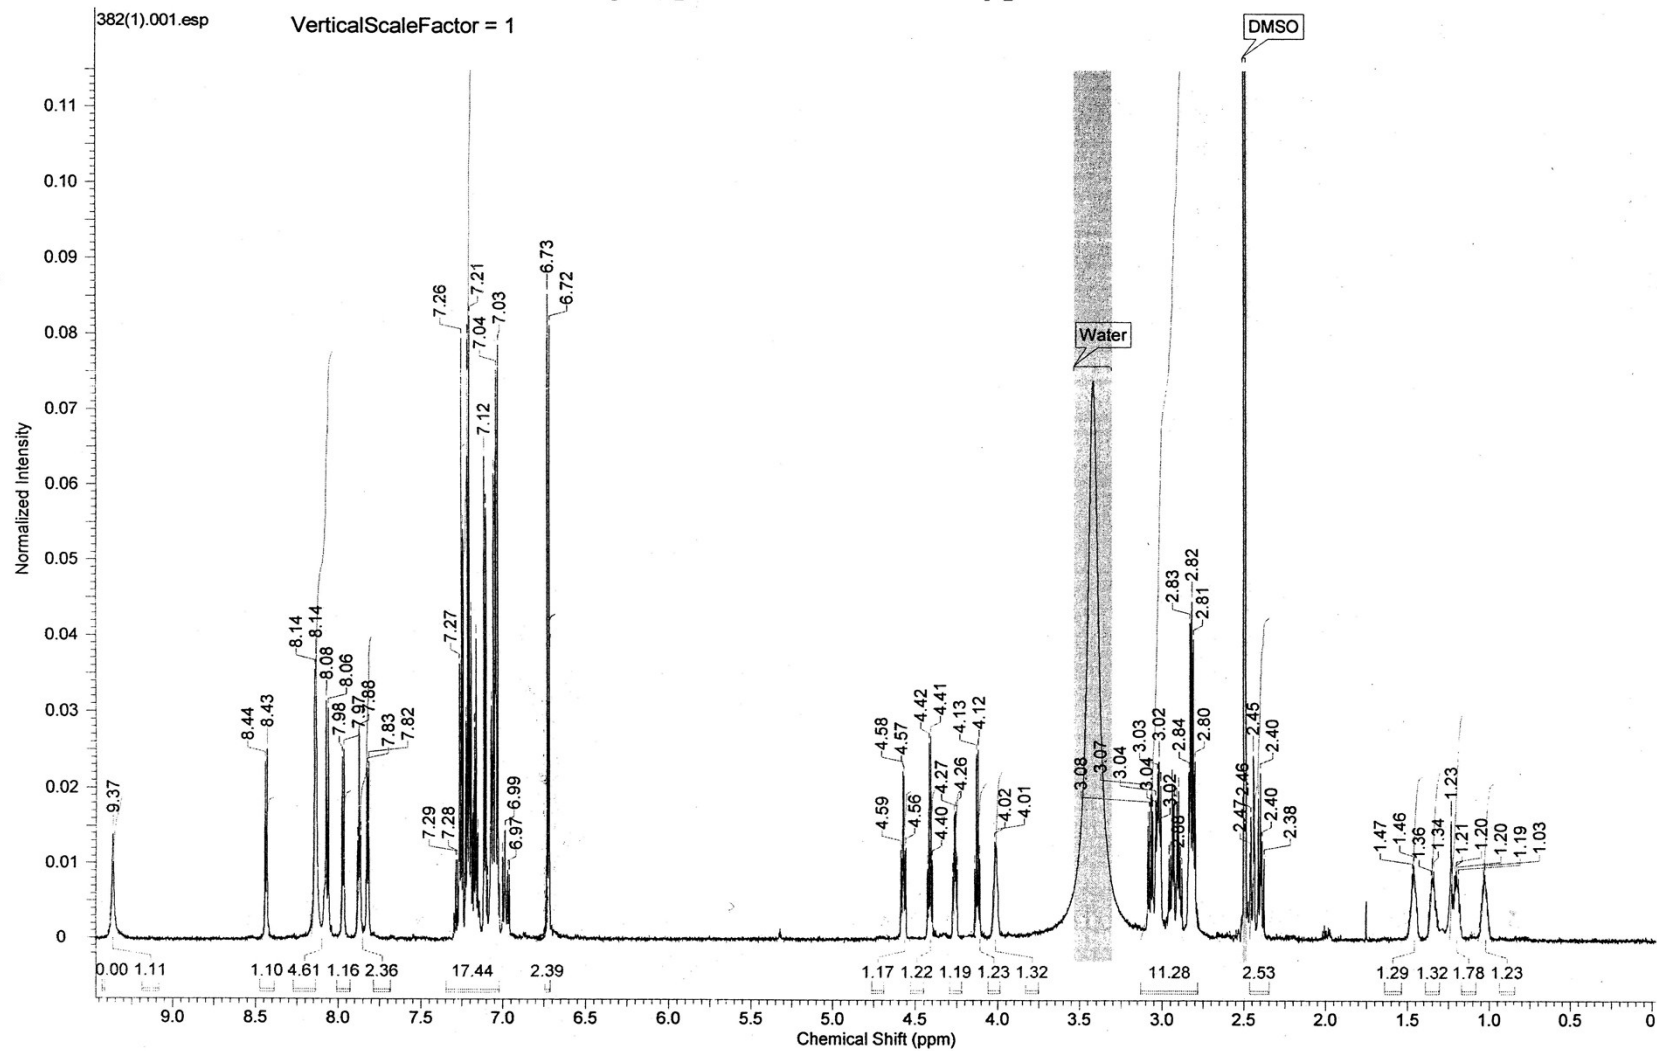

This report was created by ACD/NMR Processor Academic Edition. For more information go to [www.acdlabs.com/nmrproc/](http://www.acdlabs.com/nmrproc/)

# Tyr-c[D-Dap-Phe-Phe-Asp]NH2

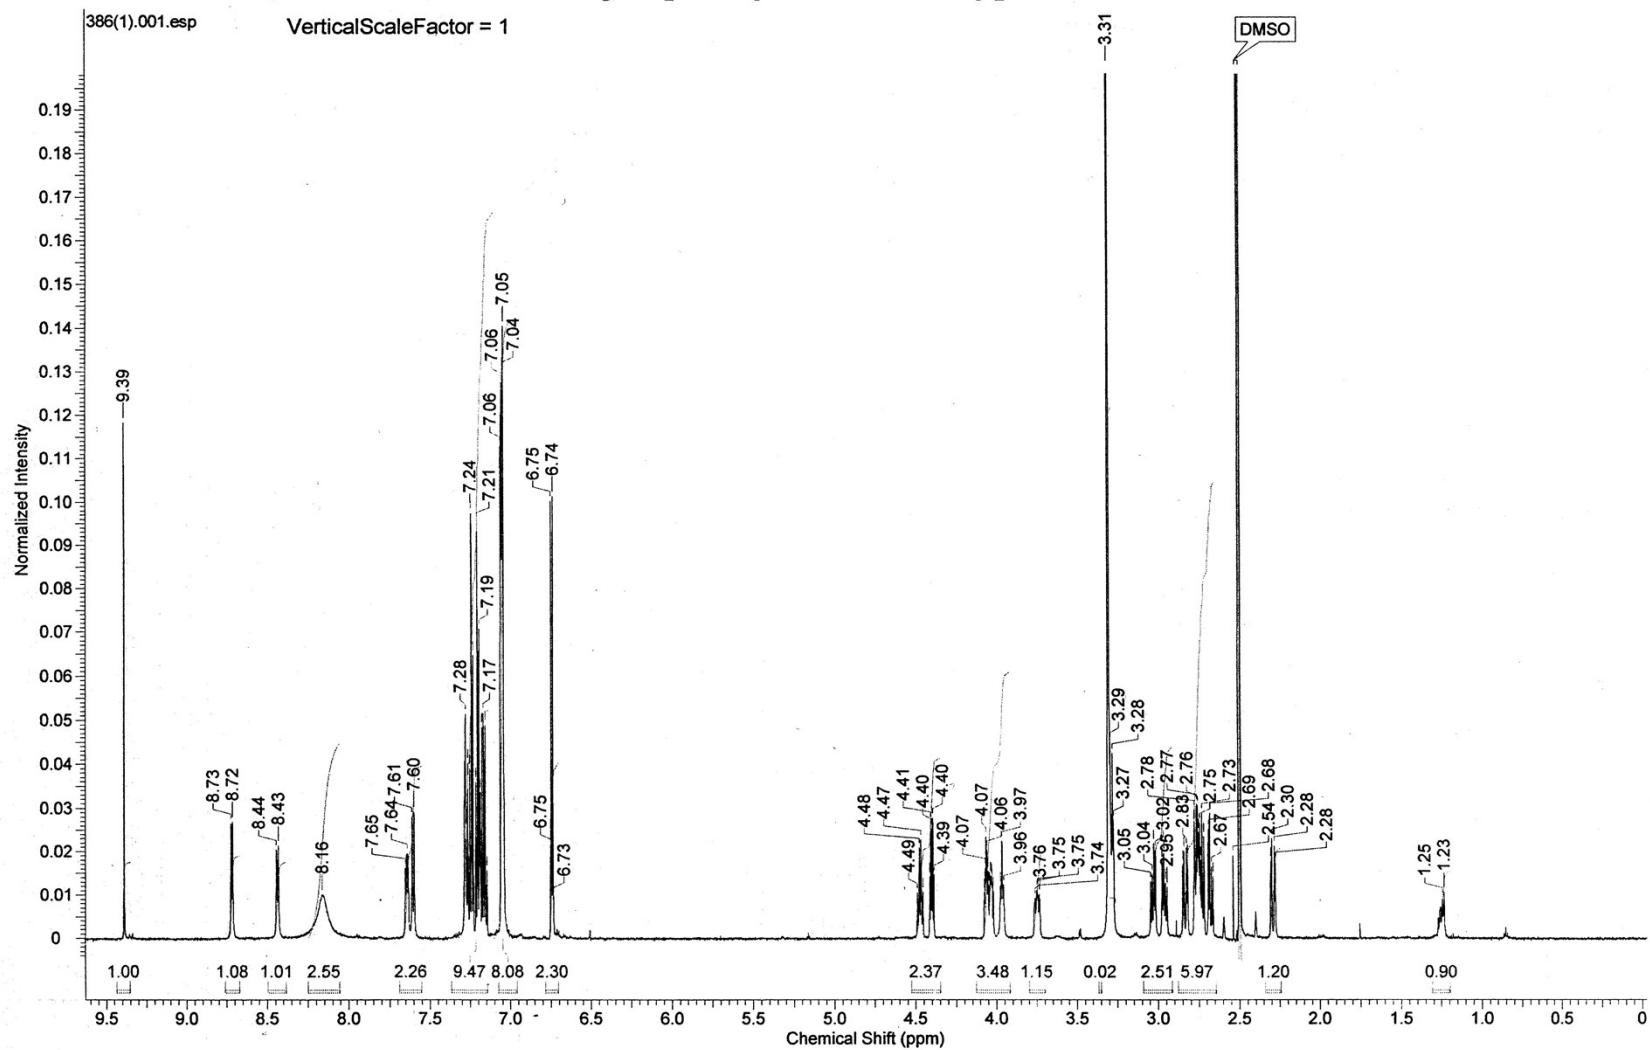

This report was created by ACD/NMR Processor Academic Edition. For more information go to [www.acdlabs.com/nmrproc/](http://www.acdlabs.com/nmrproc/)

# Tyr-c[D-Lys-Phe-Asp]NH2

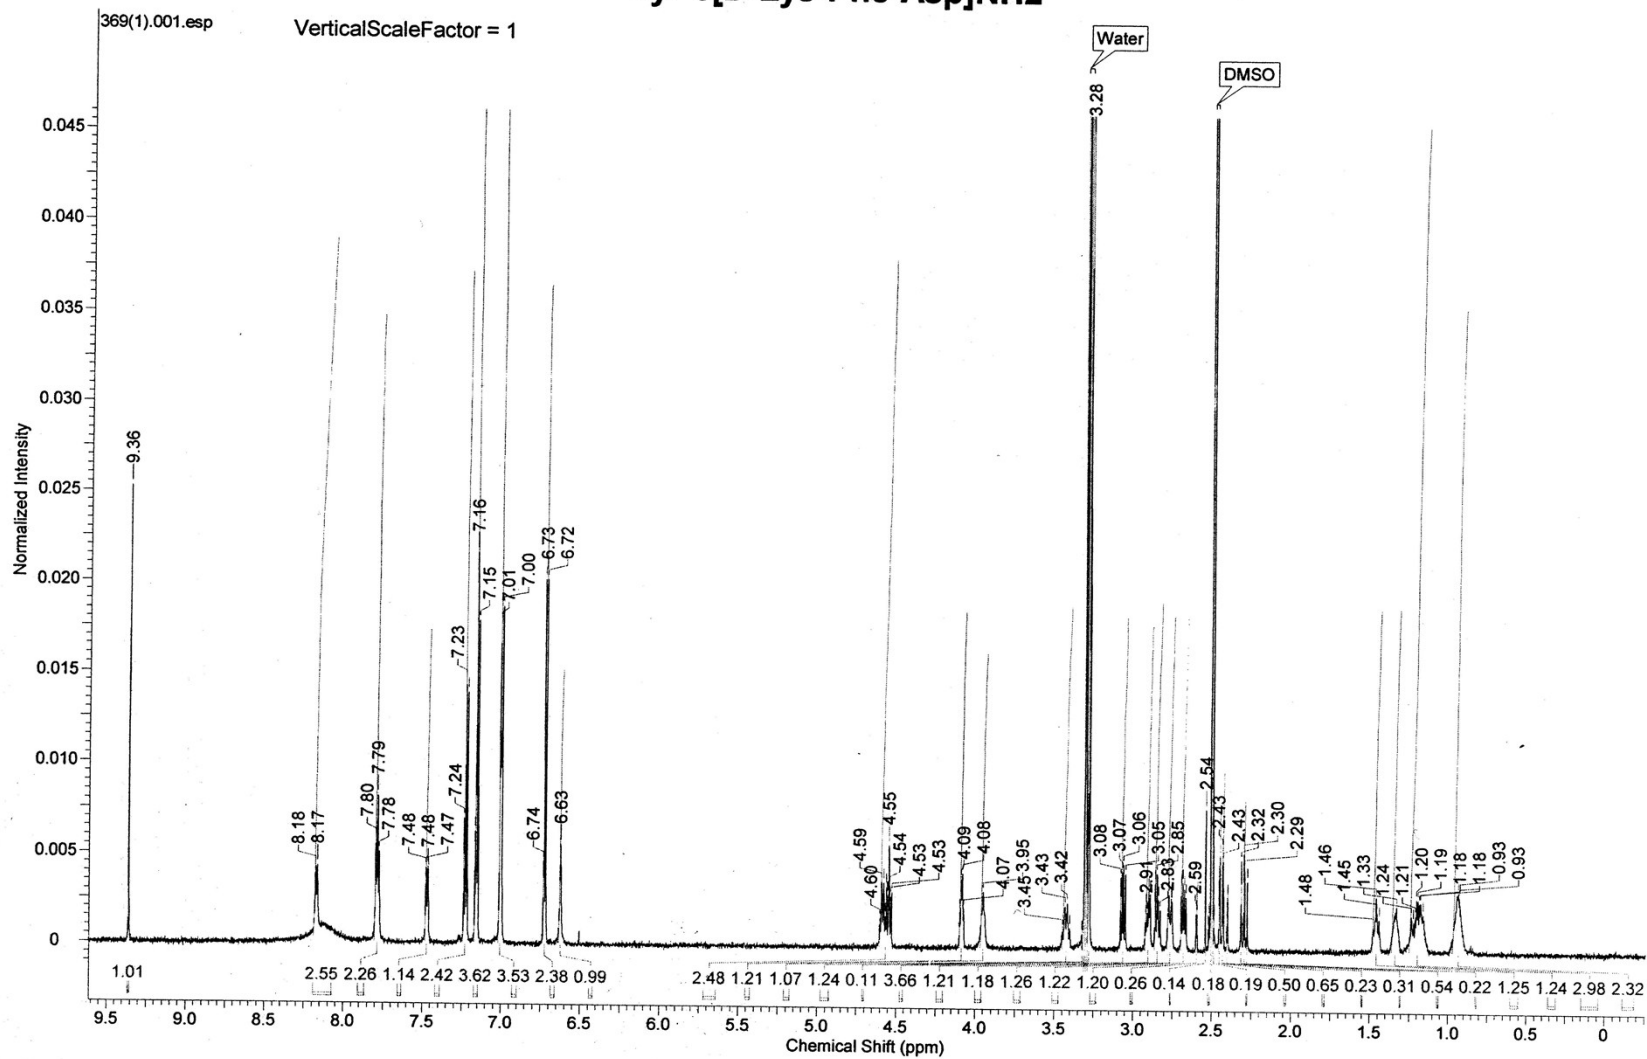

Supplement: c5ob00565e1.pdf [file c5ob00565e1.pdf]
